# Supplementary material for: New haptens synthesis, antibody production and comparative molecular field analysis for tetracyclines
Source: Royal Society of Chemistry journal article supplement (doi:10.1039/c4ra08364d), 2014-01-01
Supplement: c4ra08364d1.pdf [file c4ra08364d1.pdf]

Electronic Supplementary Material for RSC Advances

## **New Haptens Synthesis, Antibody Production and Comparative Molecular Field Analysis for Tetracyclines**

Zhanhui Wang,<sup>ab</sup> Yajie Sheng,<sup>a</sup> Hongxia Duan,<sup>c</sup> Qing Yu,<sup>a</sup> Weimin Shi<sup>ab</sup> and Suxia Zhang<sup>\*ab</sup>

a College of Veterinary Medicine, China Agricultural University, Beijing 100193, People's Republic of China

b National Reference Laboratories for Veterinary Drug Residue and Beijing Laboratory For Food Quality and Safety, Beijing 100193, People's Republic of China

c College of Science, China Agricultural University, Beijing 100193, People's Republic of China

### *Electronic Supplementary Information(ESI)*

#### **Table of contents**

|   |                                       |   |
|---|---------------------------------------|---|
| 1 | Figure captions & table captions..... | 1 |
| 2 | Figure 1.....                         | 2 |
| 3 | Figure 2.....                         | 3 |
| 4 | Table 1.....                          | 4 |

## Figure Captions

**Fig. S1** Influence of (A) the pH value, (B) the Triton concentration, (C) the salt concentration and (D) the  $\text{Ca}^{2+}$  concentration on the heterologous-coating-antigen ELISA for TC. The right-hand axes display the maximum absorbance ( $\text{OD}_{\text{max}}$ ) values, and the left axes display the  $\text{IC}_{50}$  values expressed in units of  $\text{ng mL}^{-1}$ . The  $\text{IC}_{50}/\text{OD}_{\text{max}}$  values were used to select the optimal conditions for the ELISA.

**Fig. S2** Calibration curves for the heterologous ELISA for tetracycline in PBS and in PBS-diluted milk.

## Tables Captions

**Table S1** Recoveries of TC in fortified milk ( $\mu\text{g L}^{-1}$ )

**Fig. S1** Influence of (A) the pH value, (B) the Triton concentration, (C) the salt concentration and (D) the  $\text{Ca}^{2+}$  concentration on the heterologous-coating-antigen ELISA for TC. The right-hand axes display the maximum absorbance ( $\text{OD}_{\text{max}}$ ) values, and the left axes display the  $\text{IC}_{50}$  values expressed in units of  $\text{ng mL}^{-1}$ . The  $\text{IC}_{50}/\text{OD}_{\text{max}}$  values were used to select the optimal conditions for the ELISA.

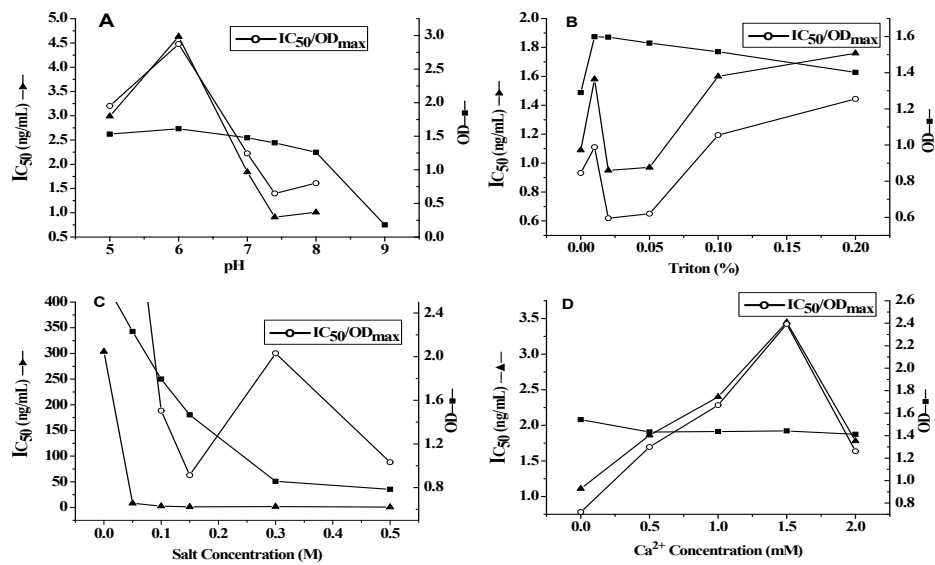

**Fig. S2** Calibration curves for the heterologous ELISA for tetracycline in PBS and in PBS-diluted milk.

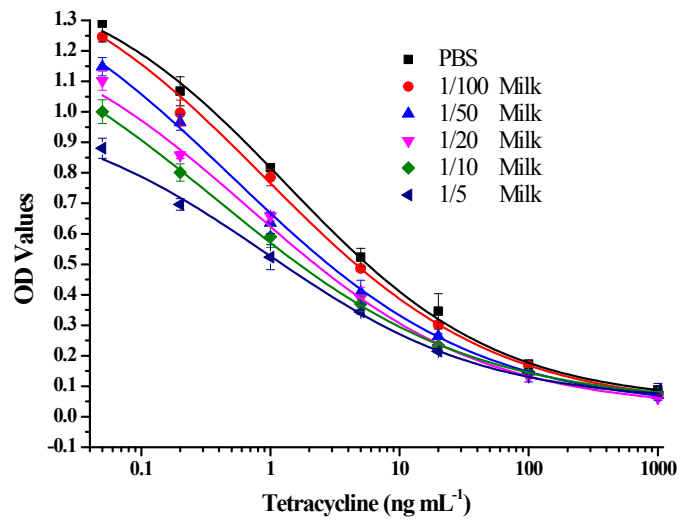

Table S1 Recoveries of TC in fortified milk ( $\mu\text{g L}^{-1}$ )

| fortified             | found | recovery (%) | intra-assay CV (%) | inter-assay CV (%) |
|-----------------------|-------|--------------|--------------------|--------------------|
| 100-fold-diluted milk |       |              |                    |                    |
| 50                    | 55.9  | 111.8        | 12.5               | 14.5               |
| 100                   | 106.3 | 106.3        | 10.4               | 13.4               |
| 200                   | 169.8 | 84.9         | 7.62               | 9.34               |
| 50-fold-diluted milk  |       |              |                    |                    |
| 50                    | 67.2  | 134.4        | 13.2               | 15.2               |
| 100                   | 127.3 | 127.3        | 11.3               | 12.4               |
| 200                   | 176.4 | 88.2         | 7.4                | 8.4                |
